# Supplementary material
Source: publisher figshare collection journal article supplement (https://acs.figshare.com/ndownloader/files/10725169)
Supplement: Supplementary file 1 [file 10725169]

data_paper 

_audit_update_record
;
2015-07-16 # Formatted by publCIF
;

_publ_requested_journal
;
Journal of Organic Chemistry
;

_publ_section_title
;
Domino reaction of pyrrolidinium ylides: Michael addition � [1,2] Stevens 
rearrangement.
; 

loop_
     _publ_author_name
     _publ_author_address
     ' Kowalkowska, Anna'
; Warsaw University of Technology, 
  Faculty of Chemistry,
  Noakowskiego 3, 
  00-664 Warsaw,
  Poland
;
     ' Jo\'nczyk, Andrzej'
; Warsaw University of Technology, 
  Faculty of Chemistry,
  Noakowskiego 3, 
  00-664 Warsaw,
  Poland
;
    'Maurin, Jan K.'
; National  Medicines Institute,
  Che\/lmska 30/34,
  00-725 Warsaw,
  Poland
  and
  National Centre for Nuclear Reserch
  So\/ltana 7  
  05-400 Otwock
  Poland
;
 
data_pw14abs 

_audit_update_record
;
2018-02-02 # Formatted by publCIF
;
 
_audit_creation_method            SHELXL-97 
_chemical_name_systematic 
; 
2-cyano-2-(2-cyanoethyl)1-methyl-3-phenylpiperidine
; 
_chemical_name_common             ? 
_chemical_melting_point           395 
_chemical_formula_moiety         
 'C16 H19 N3' 
_chemical_formula_sum 
 'C16 H19 N3' 
_chemical_formula_weight          253.34 
 
loop_ 
 _atom_type_symbol 
 _atom_type_description 
 _atom_type_scat_dispersion_real 
 _atom_type_scat_dispersion_imag 
 _atom_type_scat_source 
 'C'  'C'   0.0181   0.0091 
 'International Tables Vol C Tables 4.2.6.8 and 6.1.1.4' 
 'H'  'H'   0.0000   0.0000 
 'International Tables Vol C Tables 4.2.6.8 and 6.1.1.4' 
 'N'  'N'   0.0311   0.0180 
 'International Tables Vol C Tables 4.2.6.8 and 6.1.1.4' 
 
_symmetry_cell_setting            monoclinic 
_symmetry_space_group_name_H-M    'P 21/n' 
_symmetry_space_group_name_Hall   '-P 2yn'
 
loop_ 
 _symmetry_equiv_pos_as_xyz 
 'x, y, z' 
 '-x+1/2, y+1/2, -z+1/2' 
 '-x, -y, -z' 
 'x-1/2, -y-1/2, z-1/2' 
 
_cell_length_a                    7.12920(10) 
_cell_length_b                    9.77300(10) 
_cell_length_c                    21.1929(2) 
_cell_angle_alpha                 90.00 
_cell_angle_beta                  95.1770(10) 
_cell_angle_gamma                 90.00 
_cell_volume                      1470.56(3) 
_cell_formula_units_Z             4 
_cell_measurement_temperature     293(2) 
_cell_measurement_reflns_used   11588
_cell_measurement_theta_min     4.1740
_cell_measurement_theta_max     71.1760
 
_exptl_crystal_description               'irregular'
_exptl_crystal_colour                     'clear colourless'
_exptl_crystal_size_max                             0.498
_exptl_crystal_size_mid                             0.313
_exptl_crystal_size_min                             0.137
_exptl_crystal_density_meas       ? 
_exptl_crystal_density_diffrn     1.144 
_exptl_crystal_density_method     'not measured' 
_exptl_crystal_F_000              544 
_exptl_absorpt_coefficient_mu                       0.536
_exptl_absorpt_correction_T_min                     0.821
_exptl_absorpt_correction_T_max                     0.935
_exptl_absorpt_correction_type            analytical
_exptl_absorpt_process_details
;
CrysAlisPro 1.171.39.25a (Rigaku Oxford Diffraction, 2015)
Analytical numeric absorption correction using a multifaceted crystal
			model based on expressions derived by R.C. Clark & J.S. Reid.
(Clark, R. C. & Reid, J. S. (1995). Acta Cryst. A51, 887-897)
Empirical absorption correction using spherical harmonics,
 implemented in SCALE3 ABSPACK scaling algorithm.
;
_exptl_special_details 
; 
 ? 
; 
 
_diffrn_ambient_temperature       293(2) 
_diffrn_source 'fine-focus sealed X-ray tube'
_diffrn_source_type 'Enhance (Cu) X-ray Source'
_diffrn_radiation_probe x-ray
_diffrn_radiation_type 'Cu K\a'
_diffrn_radiation_wavelength 1.54184
_diffrn_radiation_monochromator graphite
_diffrn_measurement_device 'four-circle diffractometer'
_diffrn_measurement_device_type 'Xcalibur, Ruby'
_diffrn_measurement_method '\w scans'
_diffrn_detector 'CCD plate'
_diffrn_detector_type Ruby
_diffrn_detector_area_resol_mean 10.4922
_diffrn_standards_number          ? 
_diffrn_standards_interval_count  ? 
_diffrn_standards_interval_time   ? 
_diffrn_standards_decay_%         ? 
_diffrn_reflns_number             23250 
_diffrn_reflns_av_R_equivalents   0.0302 
_diffrn_reflns_av_sigmaI/netI     0.0128 
_diffrn_reflns_limit_h_min        -8 
_diffrn_reflns_limit_h_max        8 
_diffrn_reflns_limit_k_min        -11 
_diffrn_reflns_limit_k_max        11 
_diffrn_reflns_limit_l_min        -25 
_diffrn_reflns_limit_l_max        26 
_diffrn_reflns_theta_min          4.19 
_diffrn_reflns_theta_max          71.27 
_reflns_number_total              2845 
_reflns_number_gt                 2500 
_reflns_threshold_expression      >2sigma(I) 
 
_computing_data_collection     'CrysAlisPro 1.171.39.25a (Rigaku OD, 2015)'
_computing_cell_refinement     'CrysAlisPro 1.171.39.25a (Rigaku OD, 2015)'
_computing_data_reduction      'CrysAlisPro 1.171.39.25a (Rigaku OD, 2015)'
_computing_structure_solution     'SHELXS-97 (Sheldrick, 1990)' 
_computing_structure_refinement   'SHELXL-97 (Sheldrick, 1997)' 
_computing_molecular_graphics     'XP (Bruker AXS, 2001)'
_computing_publication_material   'SHELXL-97 (Sheldrick, 1997)' 
 
_refine_special_details 
; 
 Refinement of F^2^ against ALL reflections.  The weighted R-factor wR and 
 goodness of fit S are based on F^2^, conventional R-factors R are based 
 on F, with F set to zero for negative F^2^. The threshold expression of 
 F^2^ > 2sigma(F^2^) is used only for calculating R-factors(gt) etc. and is 
 not relevant to the choice of reflections for refinement.  R-factors based 
 on F^2^ are statistically about twice as large as those based on F, and R- 
 factors based on ALL data will be even larger. 
; 
 
_refine_ls_structure_factor_coef  Fsqd  
_refine_ls_matrix_type            full 
_refine_ls_weighting_scheme       calc  
_refine_ls_weighting_details 
 'calc w=1/[\s^2^(Fo^2^)+(0.0678P)^2^+0.2060P] where P=(Fo^2^+2Fc^2^)/3' 
_atom_sites_solution_primary      direct 
_atom_sites_solution_secondary    difmap 
_atom_sites_solution_hydrogens    geom 
_refine_ls_hydrogen_treatment     mixed 
_refine_ls_extinction_method      SHELXL 
_refine_ls_extinction_coef        0.0056(7) 
_refine_ls_extinction_expression 
 'Fc^*^=kFc[1+0.001xFc^2^\l^3^/sin(2\q)]^-1/4^' 
_refine_ls_number_reflns          2845 
_refine_ls_number_parameters      173 
_refine_ls_number_restraints      0 
_refine_ls_R_factor_all           0.0483 
_refine_ls_R_factor_gt            0.0433 
_refine_ls_wR_factor_ref          0.1309 
_refine_ls_wR_factor_gt           0.1249 
_refine_ls_goodness_of_fit_ref    1.063 
_refine_ls_restrained_S_all       1.063 
_refine_ls_shift/su_max           0.000 
_refine_ls_shift/su_mean          0.000 
 
loop_ 
 _atom_site_label 
 _atom_site_type_symbol 
 _atom_site_fract_x 
 _atom_site_fract_y 
 _atom_site_fract_z 
 _atom_site_U_iso_or_equiv 
 _atom_site_adp_type 
 _atom_site_occupancy 
 _atom_site_symmetry_multiplicity 
 _atom_site_calc_flag 
 _atom_site_refinement_flags 
 _atom_site_disorder_assembly 
 _atom_site_disorder_group 
N1 N 0.45960(14) 0.88297(11) 0.20058(5) 0.0537(3) Uani 1 1 d . . . 
N2 N 0.83896(17) 0.70762(17) 0.16057(8) 0.0838(4) Uani 1 1 d . . . 
N3 N 0.1819(2) 0.94229(19) -0.04361(7) 0.0931(5) Uani 1 1 d . . . 
C2 C 0.47810(15) 0.76992(12) 0.15594(5) 0.0462(3) Uani 1 1 d . . . 
C3 C 0.35629(15) 0.64746(12) 0.17534(5) 0.0456(3) Uani 1 1 d . . . 
H3 H 0.2271 0.6819 0.1748 0.055 Uiso 1 1 calc R . . 
C4 C 0.4140(2) 0.60383(15) 0.24358(6) 0.0600(3) Uani 1 1 d . . . 
H4A H 0.3306 0.5320 0.2558 0.072 Uiso 1 1 calc R . . 
H4B H 0.5413 0.5679 0.2467 0.072 Uiso 1 1 calc R . . 
C5 C 0.4042(2) 0.72509(18) 0.28791(6) 0.0719(4) Uani 1 1 d . . . 
H5A H 0.2740 0.7530 0.2890 0.086 Uiso 1 1 calc R . . 
H5B H 0.4520 0.6984 0.3304 0.086 Uiso 1 1 calc R . . 
C6 C 0.5178(2) 0.84352(17) 0.26650(7) 0.0675(4) Uani 1 1 d . . . 
H6A H 0.5029 0.9213 0.2941 0.081 Uiso 1 1 calc R . . 
H6B H 0.6501 0.8187 0.2701 0.081 Uiso 1 1 calc R . . 
C7 C 0.5584(2) 1.00807(16) 0.18444(8) 0.0741(4) Uani 1 1 d . . . 
H7A H 0.5405 1.0775 0.2154 0.111 Uiso 1 1 calc R . . 
H7B H 0.5090 1.0395 0.1433 0.111 Uiso 1 1 calc R . . 
H7C H 0.6904 0.9891 0.1840 0.111 Uiso 1 1 calc R . . 
C8 C 0.68234(17) 0.72887(15) 0.15786(6) 0.0573(3) Uani 1 1 d . . . 
C9 C 0.42400(16) 0.81373(13) 0.08723(6) 0.0499(3) Uani 1 1 d . . . 
H9A H 0.5157 0.8799 0.0751 0.060 Uiso 1 1 calc R . . 
H9B H 0.4313 0.7345 0.0600 0.060 Uiso 1 1 calc R . . 
C10 C 0.22699(18) 0.87645(15) 0.07528(6) 0.0582(3) Uani 1 1 d . . . 
H10A H 0.1326 0.8107 0.0856 0.070 Uiso 1 1 calc R . . 
H10B H 0.2169 0.9566 0.1018 0.070 Uiso 1 1 calc R . . 
C11 C 0.34899(18) 0.52767(12) 0.12953(6) 0.0519(3) Uani 1 1 d . . . 
C12 C 0.1822(2) 0.49788(15) 0.09339(6) 0.0636(4) Uani 1 1 d . . . 
H12 H 0.0780 0.5540 0.0962 0.076 Uiso 1 1 calc R . . 
C13 C 0.1679(3) 0.38615(19) 0.05320(8) 0.0890(6) Uani 1 1 d . . . 
H13 H 0.0544 0.3677 0.0296 0.107 Uiso 1 1 calc R . . 
C14 C 0.3187(4) 0.30309(19) 0.04795(10) 0.1047(8) Uani 1 1 d . . . 
H14 H 0.3086 0.2282 0.0208 0.126 Uiso 1 1 calc R . . 
C15 C 0.4850(4) 0.33042(18) 0.08282(12) 0.1008(7) Uani 1 1 d . . . 
H15 H 0.5885 0.2741 0.0790 0.121 Uiso 1 1 calc R . . 
C16 C 0.5016(3) 0.44171(16) 0.12408(9) 0.0757(5) Uani 1 1 d . . . 
H16 H 0.6152 0.4584 0.1480 0.091 Uiso 1 1 calc R . . 
C17 C 0.1965(2) 0.91451(15) 0.00867(7) 0.0632(4) Uani 1 1 d . . . 
 
loop_ 
 _atom_site_aniso_label 
 _atom_site_aniso_U_11 
 _atom_site_aniso_U_22 
 _atom_site_aniso_U_33 
 _atom_site_aniso_U_23 
 _atom_site_aniso_U_13 
 _atom_site_aniso_U_12 
N1 0.0480(6) 0.0573(6) 0.0560(6) -0.0090(5) 0.0061(4) -0.0034(4) 
N2 0.0431(7) 0.1044(11) 0.1051(11) 0.0112(8) 0.0137(6) 0.0127(6) 
N3 0.0938(11) 0.1190(13) 0.0666(9) 0.0202(8) 0.0080(7) 0.0378(9) 
C2 0.0344(5) 0.0553(7) 0.0493(6) -0.0020(5) 0.0058(4) 0.0054(4) 
C3 0.0380(5) 0.0524(6) 0.0467(6) -0.0012(5) 0.0063(4) 0.0047(4) 
C4 0.0585(7) 0.0716(8) 0.0501(7) 0.0065(6) 0.0053(5) 0.0001(6) 
C5 0.0785(10) 0.0917(11) 0.0460(7) -0.0053(7) 0.0080(6) -0.0089(8) 
C6 0.0636(8) 0.0846(10) 0.0537(7) -0.0162(7) 0.0020(6) -0.0077(7) 
C7 0.0724(9) 0.0662(9) 0.0837(10) -0.0114(8) 0.0073(8) -0.0168(7) 
C8 0.0413(7) 0.0703(8) 0.0610(7) 0.0043(6) 0.0092(5) 0.0056(6) 
C9 0.0449(6) 0.0554(7) 0.0505(6) 0.0022(5) 0.0094(5) 0.0031(5) 
C10 0.0501(7) 0.0666(8) 0.0577(7) 0.0078(6) 0.0048(5) 0.0093(6) 
C11 0.0603(7) 0.0481(6) 0.0489(6) 0.0022(5) 0.0142(5) 0.0046(5) 
C12 0.0770(9) 0.0613(8) 0.0524(7) -0.0048(6) 0.0053(6) -0.0041(7) 
C13 0.1293(16) 0.0769(11) 0.0617(9) -0.0167(8) 0.0131(9) -0.0231(11) 
C14 0.170(2) 0.0634(10) 0.0884(13) -0.0228(9) 0.0564(15) -0.0193(13) 
C15 0.1349(19) 0.0585(10) 0.1190(16) -0.0043(10) 0.0653(15) 0.0227(11) 
C16 0.0802(10) 0.0591(8) 0.0910(11) 0.0010(7) 0.0259(8) 0.0173(7) 
C17 0.0589(8) 0.0666(8) 0.0638(8) 0.0058(6) 0.0037(6) 0.0151(6) 
 
_geom_special_details 
; 
 All esds (except the esd in the dihedral angle between two l.s. planes) 
 are estimated using the full covariance matrix.  The cell esds are taken 
 into account individually in the estimation of esds in distances, angles 
 and torsion angles; correlations between esds in cell parameters are only 
 used when they are defined by crystal symmetry.  An approximate (isotropic) 
 treatment of cell esds is used for estimating esds involving l.s. planes. 
; 
 
loop_ 
 _geom_bond_atom_site_label_1 
 _geom_bond_atom_site_label_2 
 _geom_bond_distance 
 _geom_bond_site_symmetry_2 
 _geom_bond_publ_flag 
N1 C7 1.4668(18) . ? 
N1 C2 1.4681(15) . ? 
N1 C6 1.4725(18) . ? 
N2 C8 1.1321(17) . ? 
N3 C17 1.136(2) . ? 
C2 C8 1.5073(15) . ? 
C2 C9 1.5335(16) . ? 
C2 C3 1.5556(16) . ? 
C3 C11 1.5187(16) . ? 
C3 C4 1.5282(17) . ? 
C3 H3 0.9800 . ? 
C4 C5 1.518(2) . ? 
C4 H4A 0.9700 . ? 
C4 H4B 0.9700 . ? 
C5 C6 1.506(2) . ? 
C5 H5A 0.9700 . ? 
C5 H5B 0.9700 . ? 
C6 H6A 0.9700 . ? 
C6 H6B 0.9700 . ? 
C7 H7A 0.9600 . ? 
C7 H7B 0.9600 . ? 
C7 H7C 0.9600 . ? 
C9 C10 1.5324(17) . ? 
C9 H9A 0.9700 . ? 
C9 H9B 0.9700 . ? 
C10 C17 1.4570(19) . ? 
C10 H10A 0.9700 . ? 
C10 H10B 0.9700 . ? 
C11 C12 1.386(2) . ? 
C11 C16 1.3878(19) . ? 
C12 C13 1.383(2) . ? 
C12 H12 0.9300 . ? 
C13 C14 1.360(3) . ? 
C13 H13 0.9300 . ? 
C14 C15 1.366(3) . ? 
C14 H14 0.9300 . ? 
C15 C16 1.394(3) . ? 
C15 H15 0.9300 . ? 
C16 H16 0.9300 . ? 
 
loop_ 
 _geom_angle_atom_site_label_1 
 _geom_angle_atom_site_label_2 
 _geom_angle_atom_site_label_3 
 _geom_angle 
 _geom_angle_site_symmetry_1 
 _geom_angle_site_symmetry_3 
 _geom_angle_publ_flag 
C7 N1 C2 113.83(10) . . ? 
C7 N1 C6 109.83(11) . . ? 
C2 N1 C6 112.35(11) . . ? 
N1 C2 C8 109.01(10) . . ? 
N1 C2 C9 111.86(10) . . ? 
C8 C2 C9 105.04(9) . . ? 
N1 C2 C3 108.90(9) . . ? 
C8 C2 C3 110.43(10) . . ? 
C9 C2 C3 111.54(9) . . ? 
C11 C3 C4 112.37(10) . . ? 
C11 C3 C2 114.33(9) . . ? 
C4 C3 C2 110.84(10) . . ? 
C11 C3 H3 106.2 . . ? 
C4 C3 H3 106.2 . . ? 
C2 C3 H3 106.2 . . ? 
C5 C4 C3 110.15(12) . . ? 
C5 C4 H4A 109.6 . . ? 
C3 C4 H4A 109.6 . . ? 
C5 C4 H4B 109.6 . . ? 
C3 C4 H4B 109.6 . . ? 
H4A C4 H4B 108.1 . . ? 
C6 C5 C4 110.94(11) . . ? 
C6 C5 H5A 109.5 . . ? 
C4 C5 H5A 109.5 . . ? 
C6 C5 H5B 109.5 . . ? 
C4 C5 H5B 109.5 . . ? 
H5A C5 H5B 108.0 . . ? 
N1 C6 C5 111.95(11) . . ? 
N1 C6 H6A 109.2 . . ? 
C5 C6 H6A 109.2 . . ? 
N1 C6 H6B 109.2 . . ? 
C5 C6 H6B 109.2 . . ? 
H6A C6 H6B 107.9 . . ? 
N1 C7 H7A 109.5 . . ? 
N1 C7 H7B 109.5 . . ? 
H7A C7 H7B 109.5 . . ? 
N1 C7 H7C 109.5 . . ? 
H7A C7 H7C 109.5 . . ? 
H7B C7 H7C 109.5 . . ? 
N2 C8 C2 174.96(16) . . ? 
C10 C9 C2 114.63(9) . . ? 
C10 C9 H9A 108.6 . . ? 
C2 C9 H9A 108.6 . . ? 
C10 C9 H9B 108.6 . . ? 
C2 C9 H9B 108.6 . . ? 
H9A C9 H9B 107.6 . . ? 
C17 C10 C9 108.45(11) . . ? 
C17 C10 H10A 110.0 . . ? 
C9 C10 H10A 110.0 . . ? 
C17 C10 H10B 110.0 . . ? 
C9 C10 H10B 110.0 . . ? 
H10A C10 H10B 108.4 . . ? 
C12 C11 C16 117.84(13) . . ? 
C12 C11 C3 119.56(11) . . ? 
C16 C11 C3 122.54(13) . . ? 
C13 C12 C11 121.19(16) . . ? 
C13 C12 H12 119.4 . . ? 
C11 C12 H12 119.4 . . ? 
C14 C13 C12 120.5(2) . . ? 
C14 C13 H13 119.8 . . ? 
C12 C13 H13 119.8 . . ? 
C13 C14 C15 119.55(17) . . ? 
C13 C14 H14 120.2 . . ? 
C15 C14 H14 120.2 . . ? 
C14 C15 C16 120.82(18) . . ? 
C14 C15 H15 119.6 . . ? 
C16 C15 H15 119.6 . . ? 
C11 C16 C15 120.12(19) . . ? 
C11 C16 H16 119.9 . . ? 
C15 C16 H16 119.9 . . ? 
N3 C17 C10 176.55(15) . . ? 
 
loop_ 
 _geom_torsion_atom_site_label_1 
 _geom_torsion_atom_site_label_2 
 _geom_torsion_atom_site_label_3 
 _geom_torsion_atom_site_label_4 
 _geom_torsion 
 _geom_torsion_site_symmetry_1 
 _geom_torsion_site_symmetry_2 
 _geom_torsion_site_symmetry_3 
 _geom_torsion_site_symmetry_4 
 _geom_torsion_publ_flag 
C7 N1 C2 C8 63.45(14) . . . . ? 
C6 N1 C2 C8 -62.18(13) . . . . ? 
C7 N1 C2 C9 -52.26(14) . . . . ? 
C6 N1 C2 C9 -177.90(10) . . . . ? 
C7 N1 C2 C3 -176.01(10) . . . . ? 
C6 N1 C2 C3 58.36(12) . . . . ? 
N1 C2 C3 C11 174.86(9) . . . . ? 
C8 C2 C3 C11 -65.48(13) . . . . ? 
C9 C2 C3 C11 50.93(13) . . . . ? 
N1 C2 C3 C4 -56.90(12) . . . . ? 
C8 C2 C3 C4 62.76(13) . . . . ? 
C9 C2 C3 C4 179.17(9) . . . . ? 
C11 C3 C4 C5 -175.58(11) . . . . ? 
C2 C3 C4 C5 55.13(13) . . . . ? 
C3 C4 C5 C6 -53.91(16) . . . . ? 
C7 N1 C6 C5 173.41(13) . . . . ? 
C2 N1 C6 C5 -58.81(15) . . . . ? 
C4 C5 C6 N1 55.42(17) . . . . ? 
N1 C2 C8 N2 -27.9(17) . . . . ? 
C9 C2 C8 N2 92.1(17) . . . . ? 
C3 C2 C8 N2 -147.5(17) . . . . ? 
N1 C2 C9 C10 -54.99(14) . . . . ? 
C8 C2 C9 C10 -173.10(11) . . . . ? 
C3 C2 C9 C10 67.26(13) . . . . ? 
C2 C9 C10 C17 179.24(11) . . . . ? 
C4 C3 C11 C12 121.54(13) . . . . ? 
C2 C3 C11 C12 -110.99(12) . . . . ? 
C4 C3 C11 C16 -55.56(16) . . . . ? 
C2 C3 C11 C16 71.90(15) . . . . ? 
C16 C11 C12 C13 0.0(2) . . . . ? 
C3 C11 C12 C13 -177.20(13) . . . . ? 
C11 C12 C13 C14 -0.4(2) . . . . ? 
C12 C13 C14 C15 0.1(3) . . . . ? 
C13 C14 C15 C16 0.5(3) . . . . ? 
C12 C11 C16 C15 0.6(2) . . . . ? 
C3 C11 C16 C15 177.77(14) . . . . ? 
C14 C15 C16 C11 -0.9(3) . . . . ? 
C9 C10 C17 N3 -4(3) . . . . ? 
 
_diffrn_measured_fraction_theta_max    0.996 
_diffrn_reflns_theta_full              71.27 
_diffrn_measured_fraction_theta_full   0.996 
_refine_diff_density_max    0.184 
_refine_diff_density_min   -0.173 
_refine_diff_density_rms    0.028 
